# Supplementary material for: YB-1 promotes microtubule assembly in vitro through interaction with tubulin and microtubules
Source: PubMed Central journal article supplement (PMC2557009; doi:10.1186/1471-2091-9-23), 2008-09-15

$\tan(\alpha)$

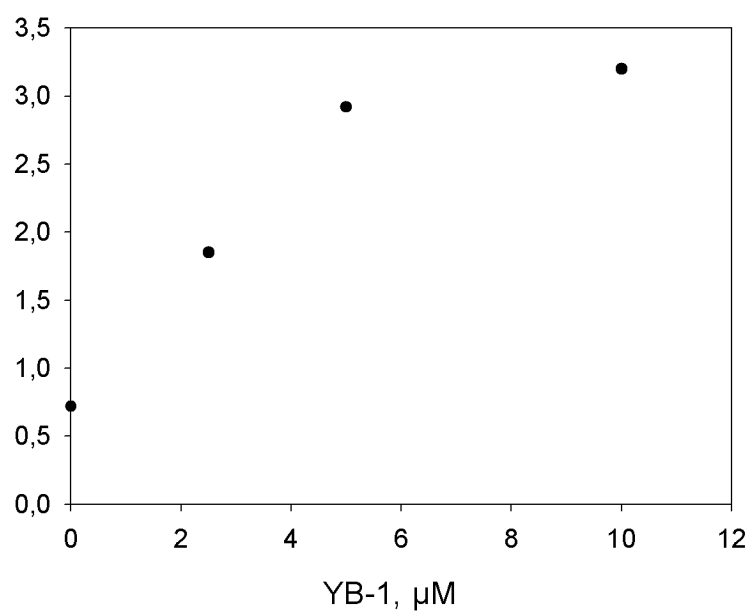

Supplement: 1471-2091-9-23-S4.pdf [file 1471-2091-9-23-S4.pdf]
